# Supplementary material for: A 3D Cell Death Assay to Quantitatively Determine Ferroptosis in Spheroids
Source: PubMed Central journal article supplement (PMC7140689; doi:10.3390/cells9030703), 2020-03-13

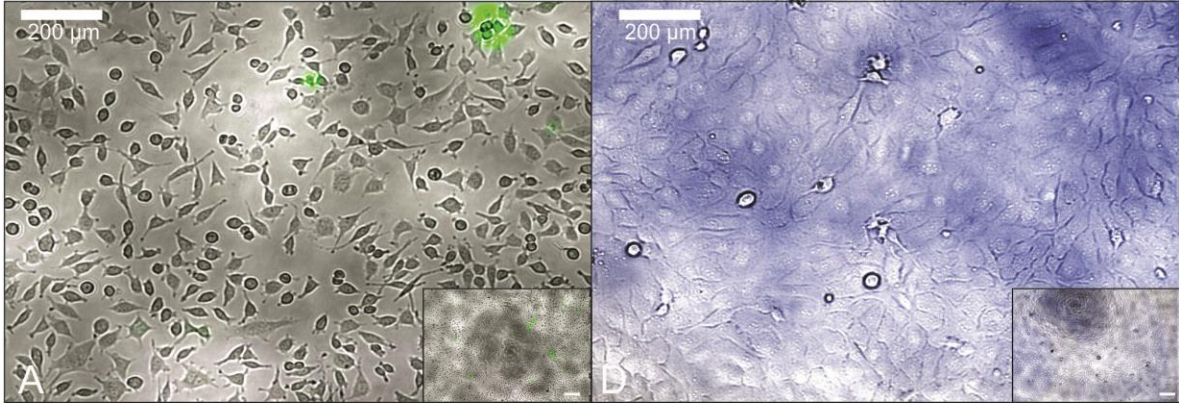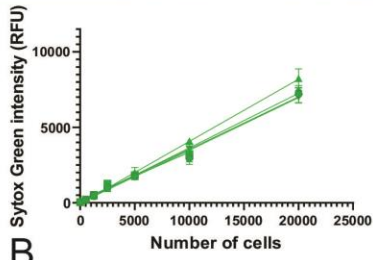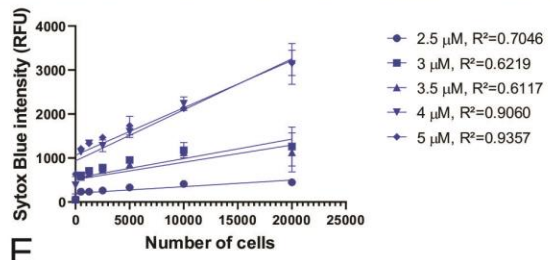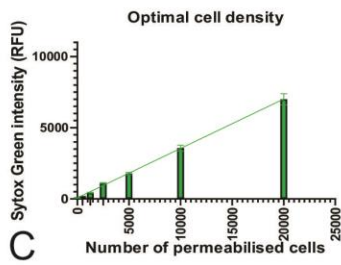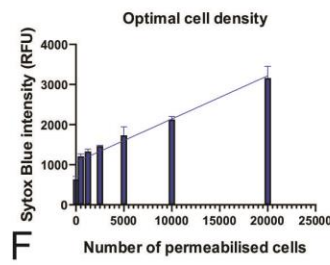

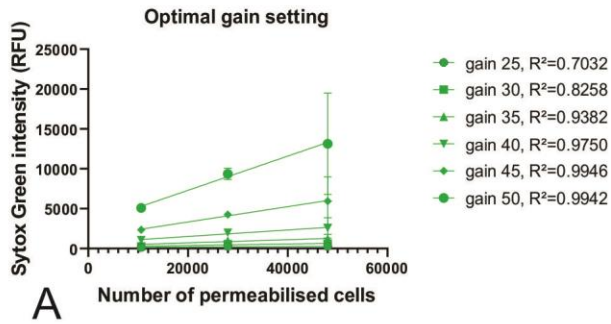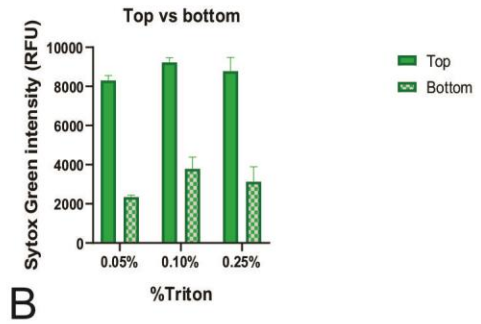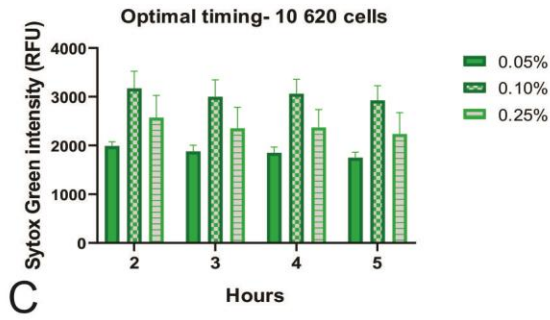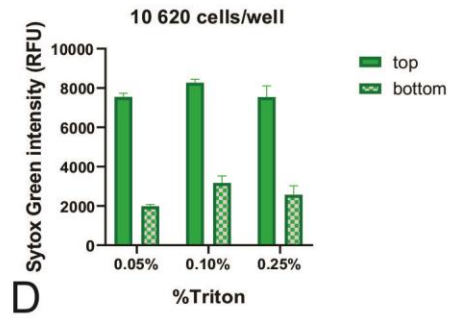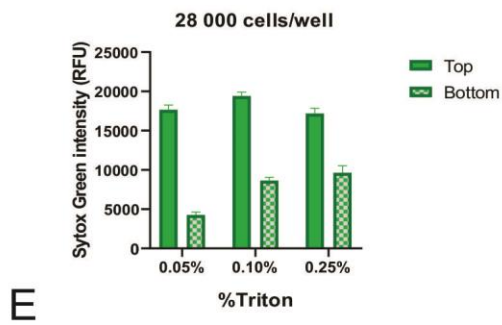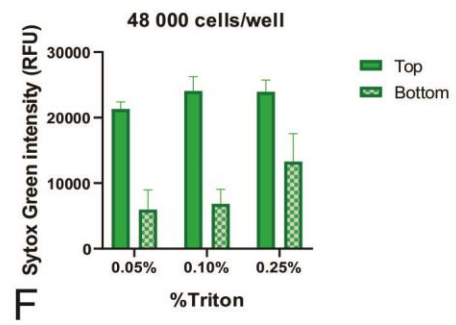

Supplement: cells-09-00703-s001.pdf [file cells-09-00703-s001.pdf]
